# Supplementary material
Source: Research Square preprint supplement (doi:10.21203/rs.3.rs-9834685/v1)
Supplement: Supplementary file 1 [file d8a868852706c20b7541541e.docx]

**SUPPLEMENTARY FILE S1**

**Survey Instrument: Full Questionnaire**

*[Author details withheld | Anonymised for peer review]*

Administration note: The survey was administered online via Qualtrics between March and June 2024 to film industry professionals recruited through FTPGI, BFI industry network, IDA, and WIFTI. Estimated completion time: 15–20 minutes. Participation was voluntary; participants could withdraw at any stage. Data were stored on password-protected Qualtrics servers compliant with GDPR and ICSSR data handling standards.

**SECTION A: DEMOGRAPHIC INFORMATION (Items 1–6)**

A1. What is your gender? (Select one)□ Woman □ Man □ Non-binary □ Gender diverse □ Prefer not to say □ Self-describe: ______

A2. What is your primary production role? (Select one)□ Director / Assistant Director □ Cinematographer / Director of Photography □ VFX / Post-Production Supervisor □ Producer / Executive Producer □ Screenwriter / Story Editor □ Editor □ Marketing / Distribution □ Other: ______

A3. In which country do you primarily work? (Select one)□ India □ United Kingdom □ United States □ Other: ______

A4. How many years of professional experience do you have in film/media production?□ Less than 5 years □ 5–15 years □ More than 15 years

A5. What is the typical scale of productions you work on?□ Independent (budget < USD 5M) □ Mid-range (USD 5M–50M) □ Major studio (> USD 50M)

A6. How frequently do you use AI tools in your current production work?□ Daily □ Weekly □ Monthly □ Rarely □ Never

**SECTION B: AI TOOL ADOPTION (Items 7–10)**

*For items B7–B10, please indicate your level of agreement on a five-point scale:1 = Strongly Disagree 2 = Disagree 3 = Neither Agree nor Disagree 4 = Agree 5 = Strongly Agree*

B7. AI tools improve production efficiency in my area of work. [ 1 | 2 | 3 | 4 | 5 ]

B8. AI has improved the quality of my creative outputs. [ 1 | 2 | 3 | 4 | 5 ]

B9. I have experienced quality failures or errors from AI-generated content in my work. [ 1 | 2 | 3 | 4 | 5 ]

B10. Studios and production companies prioritise cost savings over creative quality in their AI adoption decisions. [ 1 | 2 | 3 | 4 | 5 ]

**SECTION C: GENDERED AI EXPERIENCE SCALE — GAES (Items 11–22; α = .84)**

*The following items concern your perceptions of AI visual tools (image generation, colour grading, cinematographic AI) and gender. Please rate your agreement on the five-point scale above.*

C11. AI image generation tools encode conventional beauty standards for women. [ 1 | 2 | 3 | 4 | 5 ]

C12. AI visual tools reflect a predominantly masculine photographic gaze. [ 1 | 2 | 3 | 4 | 5 ]

C13. AI visual tools constrain my creative photographic vision. [ 1 | 2 | 3 | 4 | 5 ]

C14. AI-generated images misrepresent how I see and portray female subjects. [ 1 | 2 | 3 | 4 | 5 ]

C15. The adoption of AI tools in cinematography has widened gender inequity in my field. [ 1 | 2 | 3 | 4 | 5 ]

C16. I have had to actively work against AI tools’ default visual conventions to achieve my creative goals. [ 1 | 2 | 3 | 4 | 5 ]

C17. AI image tools generate images of women that are more objectifying than my own visual practice. [ 1 | 2 | 3 | 4 | 5 ]

C18. The gendered limitations of AI visual tools have made my work more difficult. [ 1 | 2 | 3 | 4 | 5 ]

C19. I feel that AI visual tools were designed with my creative practice and perspective in mind. [ 1 | 2 | 3 | 4 | 5 ] (Reverse-scored)

C20. I would resist adopting AI tools that reduce my creative control over how female subjects are depicted. [ 1 | 2 | 3 | 4 | 5 ]

C21. AI-generated visual content reinforces stereotypes about how women should look and be framed. [ 1 | 2 | 3 | 4 | 5 ]

C22. Audiences will increasingly distrust AI-generated depictions of women as authentic. [ 1 | 2 | 3 | 4 | 5 ]

**SECTION D: CREATIVE AUTONOMY (Items 23–27)**

D23. AI tools threaten my creative autonomy as a filmmaker/practitioner. [ 1 | 2 | 3 | 4 | 5 ]

D24. I believe AI will replace human roles in my area of production within 10 years. [ 1 | 2 | 3 | 4 | 5 ]

D25. I have declined to use an AI tool because it conflicted with my creative or ethical values. [ 1 | 2 | 3 | 4 | 5 ]

D26. When using AI tools, I feel I can exercise meaningful creative control over the visual output. [ 1 | 2 | 3 | 4 | 5 ] (Reverse-scored)

D27. The adoption of AI in film production has been driven primarily by economic rather than creative imperatives. [ 1 | 2 | 3 | 4 | 5 ]

**SECTION E: GOVERNANCE AND ETHICS (Items 28–34)**

E28. The film industry needs mandatory regulation of AI-generated visual content. [ 1 | 2 | 3 | 4 | 5 ]

E29. AI developers should be required to disclose the gender composition of their training datasets. [ 1 | 2 | 3 | 4 | 5 ]

E30. I support minimum representation requirements for women cinematographers in AI training corpora. [ 1 | 2 | 3 | 4 | 5 ]

E31. Studios should be required to label AI-generated content in theatrical releases. [ 1 | 2 | 3 | 4 | 5 ]

E32. My production company or employer has a formal policy on the ethical use of AI. [ 1 | 2 | 3 | 4 | 5 ]

E33. I am aware of the EU Artificial Intelligence Act (2024) and its implications for film production. [ 1 | 2 | 3 | 4 | 5 ]

E34. [OPEN TEXT] Please use this space to describe any specific experience you have had with AI tools producing gendered or biased visual outputs in your work (optional; maximum 250 words):

*End of Survey. Thank you for your participation.*

**GAES SCORING PROTOCOL**

GAES subscale items: C11–C22 (12 items). Items C19 and C26 are reverse-scored before summation. Total GAES score range: 12–60. Higher scores indicate greater perceived gender bias in AI visual tools and greater experiential marginalisation. Cronbach’s α = .84 in this study’s sample. CFA fit: CFI = .96, RMSEA = .047.
